# Supplementary material
Source: PubMed Central journal article supplement (PMC3700114)
Supplement: MCB.01362-12_zmb999100014so1.pdf [file MCB.01362-12_zmb999100014so1.pdf]

**Supplementary Table 1. List of putative JNK interacting proteins identified by mass spectrometry.** The most biologically informative columns and cells are highlighted in yellow. The designation “M[147]” means Met oxidation, a likely and common artifact of sample preparation. The spectral count (also termed “instance”) is a quantitative estimate of the relative abundance of a given peptide, and is peptide-specific. Non-degenerate evidence for the peptide being derived exclusively from the listed protein is designated “Y”, based on protein database annotation, or if it could be derived from 2 or more proteins it is designated “N”.
